# Supplementary material for: EPR and optical studies of erbium-doped β-PbF2 single-crystals and nanocrystals in transparent glass–ceramics
Source: Royal Society of Chemistry journal article supplement (doi:10.1039/b706735f), 2007-01-01
Supplement: b706735f.pdf [file b706735f.pdf]

**Electronic Supplementary Information for PCCP  
To**

**“EPR and optical studies of erbium-doped  $\beta$ -PbF<sub>2</sub> single-crystals and  
nanocrystals in transparent glass-ceramics”**

Géraldine Dantelle, Michel Mortier, Daniel Vivien

Laboratoire de Chimie de la Matière Condensée de Paris – ENSCP – UMR 7574 –  
11 rue Curie – F- 75231 PARIS Cedex 05 – France.

**Figure caption**

**Figure S1:** Absorption spectrum of PbF<sub>2</sub>:2%ErF<sub>3</sub> at 10K.

**Figure S2:** Absorption spectra corresponding to the transition  $^4I_{15/2} \rightarrow ^4G_{11/2}$  for the different single-crystals. The absorption spectra of PbF<sub>2</sub>:0.2%Er and PbF<sub>2</sub>:0.02%Er have been multiplied by respectively 10 and 100.

**Figure S3:** Emission spectra of PbF<sub>2</sub>:0.2%Er under different excitation wavelengths using some particular lines of the Ar<sup>+</sup> ion laser: (a)  $\lambda_{\text{exc}} = 476$  nm, (b)  $\lambda_{\text{exc}} = 488$  nm, (c)  $\lambda_{\text{exc}} = 514$  nm.  $T = 15$  K.

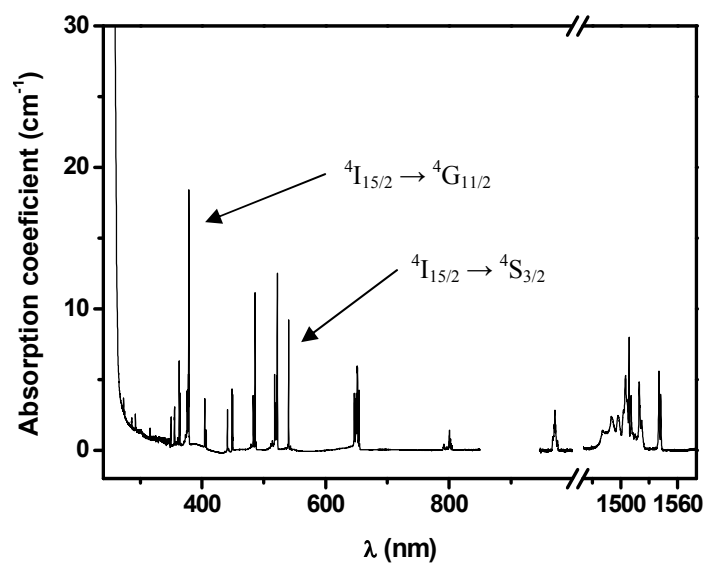

**Figure S1:** Absorption spectrum of  $\text{PbF}_2\text{:}2\%\text{ErF}_3$  at 10K.

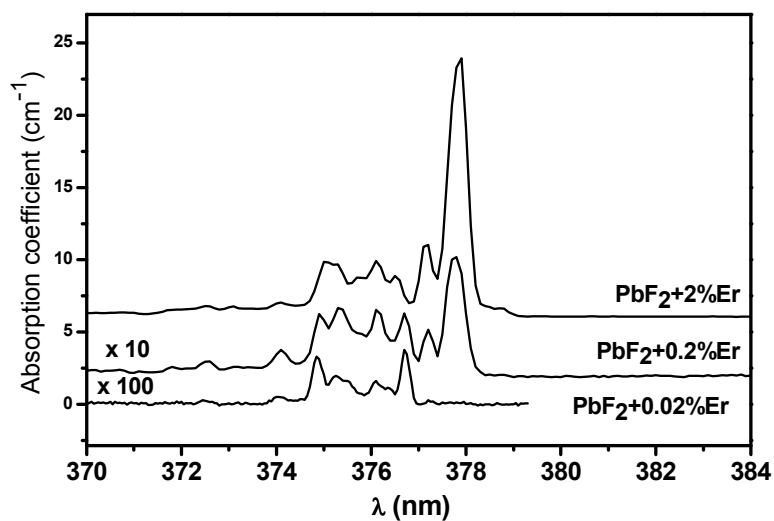

**Figure S2:** Absorption spectra corresponding to the transition  ${}^4\text{I}_{15/2} \rightarrow {}^4\text{G}_{11/2}$  for the different single-crystals. The absorption spectra of  $\text{PbF}_2\text{:}0.2\%\text{Er}$  and  $\text{PbF}_2\text{:}0.02\%\text{Er}$  have been multiplied by respectively 10 and 100.

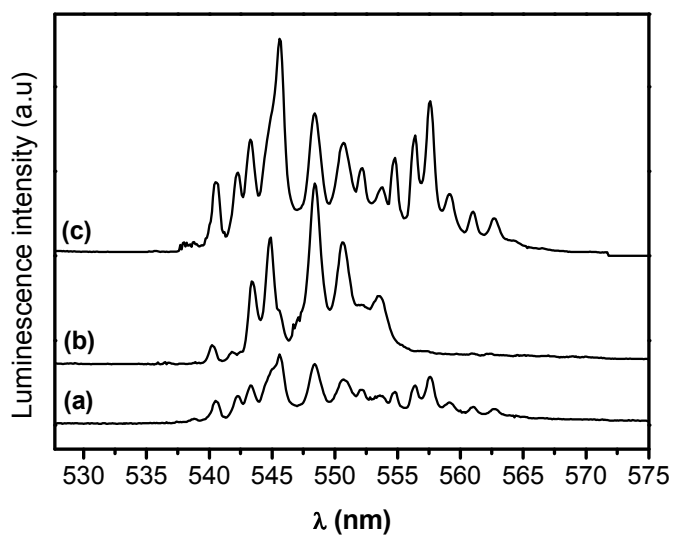

**Figure S3:** Emission spectra of  $\text{PbF}_2:0.2\%\text{Er}$  under different excitation wavelengths using some particular lines of the  $\text{Ar}^+$  ion laser: (a)  $\lambda_{\text{exc}} = 476$  nm, (b)  $\lambda_{\text{exc}} = 488$  nm, (c)  $\lambda_{\text{exc}} = 514$  nm.  $T = 15\text{K}$ .
